# Supplementary material for: Changes in early aperiodic EEG activity are linked to autism diagnosis and language development in infants with family history of autism
Source: PubMed Central journal article supplement — medRxiv. 2025 Apr 29:2024.12.15.24319061. Originally published 2024 Dec 16. Preprint. [Version 2] doi: 10.1101/2024.12.15.24319061 (PMC11702732; doi:10.1101/2024.12.15.24319061), 2025-04-29
Supplement: media-1.pdf [file media-1.pdf]

Supplemental Table 1

| 3-month EEG data         | Outcome     |              |              | Statistics                    |                           |
|--------------------------|-------------|--------------|--------------|-------------------------------|---------------------------|
|                          | EFL-ASD     | EFL-NoASD    | LL-NoASD     | Kruskal Wallis<br>H statistic | Kruskal Wallis<br>p-value |
| Absolute Gamma           | -18.9 (2.6) | -18.7 (3.9)  | -18.1 (2.8)  | 2.02                          | 0.36                      |
| Aperiodic Offset         | -0.16 (0.2) | -0.18 (0.18) | -0.14 (0.16) | 0.82                          | 0.66                      |
| Aperiodic Slope          | 1.08 (0.11) | 1.06 (0.15)  | 1.03 (0.11)  | 2.39                          | 0.30                      |
| Total Aperiodic Activity | -62.9 (9.0) | -63.4 (12.1) | 59.6 (9.3)   | 4.78                          | 0.09                      |
| Periodic Gamma           | 2.15 (0.67) | 2.47 (1.5)   | 1.92 (1.1)   | 4.00                          | 0.13                      |

**Supplemental Table 2**

| <i>Predictors</i>                                    | <b>Aperiodic Total Power</b> |                   |                  |                 | <b>Aperiodic Offset</b> |                   |                  |                 | <b>Aperiodic Exponent</b> |                   |                  |                 |
|------------------------------------------------------|------------------------------|-------------------|------------------|-----------------|-------------------------|-------------------|------------------|-----------------|---------------------------|-------------------|------------------|-----------------|
|                                                      | <i>Estimates</i>             | <i>std. Error</i> | <i>Statistic</i> | <i>p</i>        | <i>Estimates</i>        | <i>std. Error</i> | <i>Statistic</i> | <i>p</i>        | <i>Estimates</i>          | <i>std. Error</i> | <i>Statistic</i> | <i>p</i>        |
| (Intercept)                                          | -63.39                       | 0.18              | -30.64           | <b>&lt;0.01</b> | -0.19                   | 0.18              | -4.56            | <b>&lt;0.01</b> | 1.05                      | 0.25              | 40.11            | <b>&lt;0.01</b> |
| age                                                  | 20.52                        | 0.24              | 7.39             | <b>&lt;0.01</b> | 0.44                    | 0.23              | 8.19             | <b>&lt;0.01</b> | 0.06                      | 0.32              | 1.71             | 0.09            |
| Outcome [EFL-NoASD]                                  | -1.64                        | 0.26              | -0.56            | 0.58            | -0.02                   | 0.25              | -0.28            | 0.78            | 0.01                      | 0.36              | 0.40             | 0.69            |
| Outcome[LL-NoASD]                                    | 3.75                         | 0.21              | 1.55             | 0.12            | 0.06                    | 0.21              | 1.13             | 0.26            | -0.02                     | 0.29              | -0.53            | 0.60            |
| sex                                                  | 0.11                         | 0.13              | 0.07             | 0.94            | 0.02                    | 0.13              | 0.52             | 0.60            | 0.01                      | 0.18              | 0.75             | 0.45            |
| age ×<br>Outcome [EFL-NoASD]                         | -4.50                        | 0.34              | -1.15            | 0.25            | -0.15                   | 0.32              | -2.00            | <b>0.05</b>     | -0.07                     | 0.46              | -1.49            | 0.14            |
| age ×<br>Outcome [LL-NoASD]                          | -6.67                        | 0.29              | -2.04            | <b>0.04</b>     | -0.13                   | 0.27              | -2.08            | <b>0.04</b>     | -0.01                     | 0.38              | -0.17            | 0.86            |
| <b>Random Effects</b>                                |                              |                   |                  |                 |                         |                   |                  |                 |                           |                   |                  |                 |
| $\sigma^2$                                           | 61.69                        |                   |                  |                 | 0.02                    |                   |                  |                 | 0.01                      |                   |                  |                 |
| $\tau_{00}$                                          | 4.69                         |                   |                  |                 | 0.00                    |                   |                  |                 | 0.00                      |                   |                  |                 |
| ICC                                                  | 0.07                         |                   |                  |                 | 0.14                    |                   |                  |                 | 0.15                      |                   |                  |                 |
| N                                                    | 73                           |                   |                  |                 | 73                      |                   |                  |                 | 73                        |                   |                  |                 |
| Observations                                         | 146                          |                   |                  |                 | 146                     |                   |                  |                 | 146                       |                   |                  |                 |
| Marginal R <sup>2</sup> / Conditional R <sup>2</sup> | 0.504 / 0.539                |                   |                  |                 | 0.528 / 0.593           |                   |                  |                 | 0.057 / 0.203             |                   |                  |                 |
